# Supplementary material
Source: Research Square preprint supplement (doi:10.21203/rs.3.rs-9596483/v1)
Supplement: Supplementary file 1 [file 00cd70d227ef56ecff20add2.docx]

**Table 1. Baseline characteristics and reason for consultation (n = 51)**

| **Variable** | **n (%)** | **Mean ± SD** |
| --- | --- | --- |
| Age (years) | — | 34.7 ± 8.9 |
| Age range (years) | — | 18–56 |
| Aesthetic-functional consultation | 33 (64.7%) | — |
| Erectile dysfunction / premature ejaculation | 18 (35.3%) | — |
| No relevant comorbidities | 44 (86.3%) | — |

*SD: standard deviation.*
