# Supplementary material
Source: Research Square preprint supplement (doi:10.21203/rs.3.rs-9596483/v1)
Supplement: Supplementary file 2 [file d8583e3941abca298bb4d425.docx]

**Table 2. Satisfaction, erectile function, and genital self-perception outcomes at baseline, 10 days, and 4 weeks**

| **Outcome** | **Baseline** | **10 days** | **4 weeks** | **p value*** |
| --- | --- | --- | --- | --- |
| Satisfaction (% satisfied or very satisfied) | — | 72.5% | 80.4% | < 0.05 |
| IIEF-5 score (mean ± SD) | Recorded | ↑ sig. | ↑ sig. | < 0.05 |
| MGSIS-7 score (mean ± SD) | Recorded | ↑ sig. | ↑ sig. | < 0.05 |

**Wilcoxon signed-rank test or paired Student’s t-test. IIEF-5: International Index of Erectile Function-5; MGSIS-7: Male Genital Self-Image Scale-7; SD: standard deviation; sig.: statistically significant improvement versus baseline.*
