# Supplementary material
Source: Research Square preprint supplement (doi:10.21203/rs.3.rs-9596483/v1)
Supplement: Supplementary file 3 [file dd85236e9b7543823f14cff6.docx]

**Table 3. Adverse events recorded according to CTCAE v5.0 (n = 51)**

| **Adverse event** | **n (%)** | **CTCAE grade** |
| --- | --- | --- |
| Local pain | 8 (15.7%) | 1 |
| Oedema | 6 (11.8%) | 1 |
| Ecchymosis | 5 (9.8%) | 1 |
| Grade ≥ 2 events | 0 (0%) | — |
| Systemic complications | 0 (0%) | — |

*CTCAE: Common Terminology Criteria for Adverse Events v5.0.*
